# Supplementary material
Source: Springer Nature journal article supplement (https://www.springermedizin.de/resource/supplementary/13256_2012_2210_MOESM1_ESM.pdf/9649334)

**A**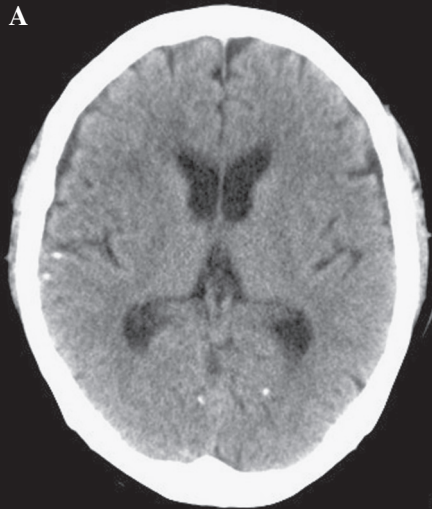**B**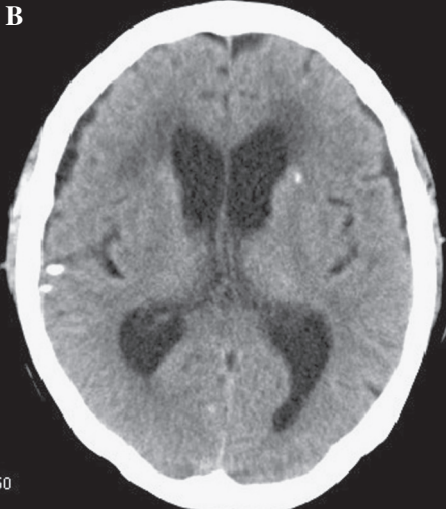

50

DF

Supplement: MOESM1 [file 9649334]
